# Supplementary material for: Vitamin D Decreases Plasma Trimethylamine‐N‐oxide Level in Mice by Regulating Gut Microbiota
Source: Hindawi journal article supplement (doi:10.1155/2020/9896743), 2020-01-01
Supplement: f1 [file 9896743.f1.pdf]

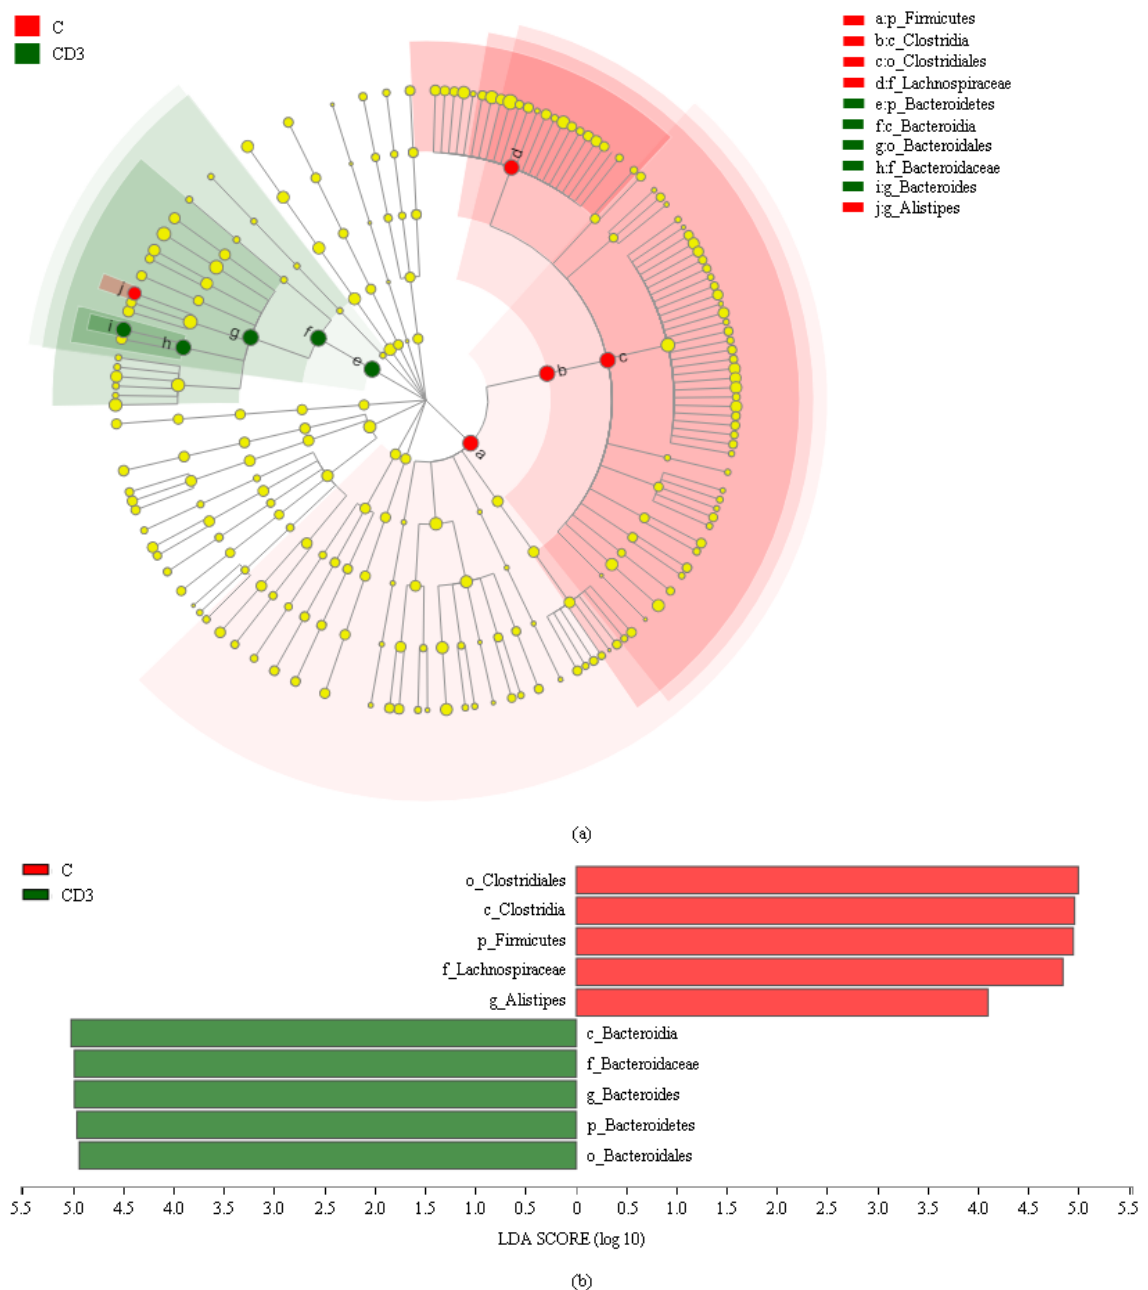

FIGURE S1: Taxonomic cladogram and LDA scores for LefSe analysis of gut microbiota in the C and CD3 groups. (a) Taxonomic cladogram represents significant differences in taxa between groups (n=5). Taxonomic levels from phylum to genus are represented by rings. (b) LDA scores for differentially abundant taxa between groups (taxa with an LDA significant threshold  $\geq 4$  are shown).
